# Supplementary material
Source: Elsevier journal article supplement (https://www.sciencedirect.com/science/article/pii/S0300893218300113)
Supplement: mmc1 [file S0300893218300113:mmc1.pdf]

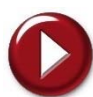

## Material suplementario

# Valor predictivo de la albúmina plasmática, la vitamina D y las apolipoproteínas A y B como biomarcadores de riesgo coronario en el estudio REGICOR

## Tabla material suplementario

Tabla de reclasificación con la estimación de individuos que se mueven de un grupo de riesgo a otro al incluir la albúmina en la estimación del riesgo en la población con (A) y sin (B) eventos coronarios

|                                                    | Función de riesgo clásica + albúmina |                 |             |
|----------------------------------------------------|--------------------------------------|-----------------|-------------|
|                                                    | Riesgo bajo                          | Riesgo moderado | Riesgo alto |
| <b>A. Subgrupo que sufre eventos coronarios</b>    |                                      |                 |             |
| <i>Función de riesgo clásica</i>                   |                                      |                 |             |
| Riesgo bajo                                        | 67                                   | 22              | 0           |
| Riesgo moderado                                    | 8                                    | 24              | 6           |
| Riesgo alto                                        | 0                                    | 2               | 19          |
| <b>B. Subgrupo que no sufre eventos coronarios</b> |                                      |                 |             |
| <i>Función de riesgo clásica</i>                   |                                      |                 |             |
| Riesgo bajo                                        | 518                                  | 0               | 0           |
| Riesgo moderado                                    | 8                                    | 36              | 1           |
| Riesgo alto                                        | 0                                    | 5               | 8           |
